# Supplementary material
Source: PubMed Central journal article supplement (PMC4634110)
Supplement: NIHMS712193-supplement-Supp_FigureS1.pdf [file NIHMS712193-supplement-Supp_FigureS1.pdf]

**Radiologic evidence that hypothalamic gliosis is associated with obesity and insulin resistance in humans**

Ellen A. Schur<sup>1</sup>, Susan J. Melhorn<sup>1</sup>, Seok-Kyun Oh<sup>2</sup>, J. Matthew Lacy<sup>3</sup>, Kathryn E. Berkseth<sup>4</sup>, Stephan J. Guyenet<sup>4</sup>, Joshua A. Sonnen<sup>3</sup>, Vidhi Tyagi<sup>1</sup>, Mary Rosalynn B. De Leon<sup>1</sup>, Mary F. Webb<sup>5</sup>, Zenobia T. Gonsalves<sup>1</sup>, Corinne L. Fligner<sup>3</sup>, Michael W. Schwartz<sup>4</sup>, Kenneth R. Maravilla<sup>2</sup>

<sup>1</sup>Department of Medicine, Division of General Internal Medicine, University of Washington; Seattle, WA; <sup>2</sup>Department of Radiology, University of Washington; Seattle, WA; <sup>3</sup>Department of Pathology, University of Washington; Seattle, WA; <sup>4</sup>Department of Medicine, Division of Metabolism, Endocrinology and Nutrition, University of Washington; Seattle, WA; <sup>5</sup>Department of Epidemiology, University of Washington; Seattle, WA.

**Contact Info:** Ellen Schur, MD, MS, Harborview Medical Center, 325 Ninth Ave, Box 359780, Seattle, WA 98104 Phone: 206-744-1830 Fax: 206-744-9917 Email: [ellschur@u.washington.edu](mailto:ellschur@u.washington.edu)

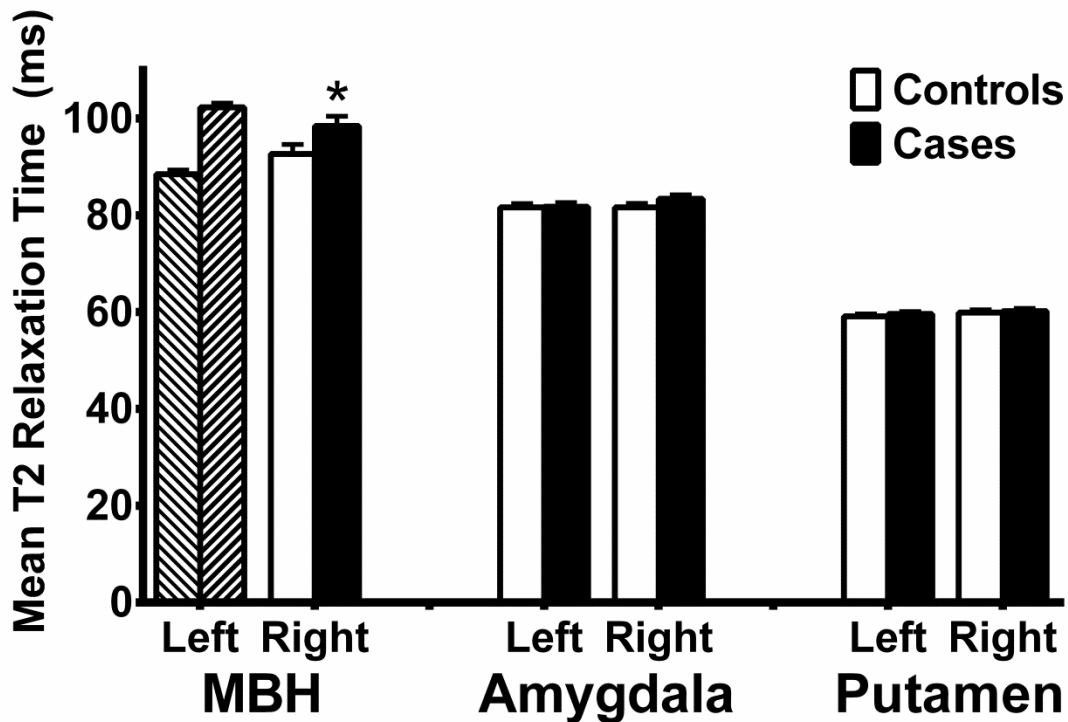

**Figure S1. Mean T2 relaxation times in regions of interest.** Cases were identified as the tertile with the highest mean T2 relaxation time in the left mediobasal hypothalamus (MBH) (hash marks). T2 relaxation time was higher among cases in the right MBH, but did not differ between cases and controls in reference regions. Data are least square means  $\pm$  SEM; P-values determined from linear regression. Data are adjusted for sex and age. N=23 (Controls), 22 (Cases). \*P<0.05.
